# Supplementary material for: <strong>Data Envelopment Analysis (DEA) to Estimate Technical and Scale Efficiencies of Smallholder Pineapple Farmers in Ghana</strong>
Source: Preprints.org preprint supplement (doi:10.20944/preprints202403.0138.v1), 2024-03-04
Supplement: Supplementary file 2 [file supplementary]

SN	q18ai	q18aii	q18aiii	q18aiv	q18av	q18avi	q18avii	q18aviii	q18aix	q18ax	q18axi	q18bi	q18bii	q18biii	q18biv	q18bv	q18bvi	q18bvii	q18bviii	q18bix	q18bx	q18bxi	q19ai	q19aii	q19aiii	q19aiv	q19av	q19avi	q19avii	q19aviii	q19aix	q19ax	q19axi	q19axii	q19axiii	q19bi	q19bii	q19biii	q19biv	q19bv	q19bvi	q19bvii	q19bviii	q19bix	q19bx	q19bxi	q19bxii	q19bxiii	q20
1	5		99	3	2	4	1	6	99	2	99	40		99	25	50	50	30	30	99	15	99	23000	5	5	5	5	99	99				99	99	5	0.1	400	300	232	60	99	99				99	99	232	18000
2	2		99	2	99	1	2	1	99	1	99	50		99	5	99	40	45	40	99	5	99	20000	5	5	2	2	99	99				99	99	2	0.2	50	50	60	60	99	99				99	99	200	18000
3	1		99	6	99	2	2	3	1	2	99	100		99	20	99	30	20	30	120	20	99	24000	1	1	1	1	99	99				99	99	1	0.2	150	180	180	120	99	99				99	99	100	20000
4	7		7	1	1	10	2	1	1	2	99	50		220	21	60	30	90	30	120	90	99	23000	7	7	2	2	99	99				99	7	7	0.2	30	30	30	30	99	99				99	30	40	23000
5	20		1.5	5	3	3	6	4	2	3	99	50		300	20	50	20	12	35	200	10	99	24000	2	2	2	2	99	99				99	99	50	0.1	30	30	30	30	99	99				99	99	4	18000
6	1		99	2	99	99	2	1	1	99	99	50		99	25	99	99	10	40	180	99	99	5000	2	2	2	2	99	99				99	99	16	0.05	150	150	150	150	99	99				99	99	5	4500
7	2		99	4	99	2	4	2	2	99	99	50		99	25	30	15	25	50	99	99	99	10000	2	2	2	2	99	99				99	99	99	0.1	30	30	30	30	99	99				99	99	99	7000
8	1.5		99	2	1	2	2	1	1	99	99	50		99	30	60	30	20	30	120	99	99	24000	3	3	3	3	99	99				99	99	1	0.1	30	30	30	30	99	99				99	99	60	20000
9	1		3	99	99	1	2	99	99	99	99	100		99	30	99	99	35	50	99	99	99	6000	8	8	4	4	99	99				99	99	6	0.2	25	25	25	25	99	99				99	99	6	1000
10	1		99	2	1	2	1	1	1	99	99	100		99	30	50	50	20	35	50	99	99	24000	3	3	3	3	99	99				99	99	7	0.1	25	25	25	25	99	99				99	99	6	18000
11	5		99	2	1	2	2	1	99	2	99	50		99	30	60	30	20	25	99	20	99	24000	3	3	3	3	99	99				99	99	10	0.1	30	30	30	30	99	99				99	99	4	18000
12	2		99	1	1	1	1	99	1	1	99	50		99	25	60	35	40	99	200	40	99	23000	8	8	2	2	99	99				99	99	7	0.1	30	30	25	25	99	99				99	99	6	20000
13	3		99	3	99	4	3	4	1	3	99	150		99	25	99	25	20	30	150	20	99	18000	4	4	4	4	99	99				99	99	4	0.1	80	80	60	30	99	99				99	99	10	10000
14	1		1	2	1	1	1	99	1	1	99	150		250	10	60	25	30	99	70	30	99	13000	3	3	3	3	99	99				99	99	3	0.2	25	25	25	25	99	99				99	99	6	10000
15	1		99	2	1	2	2	2	1	2	99	100		99	30	60	30	20	60	120	20	99	24000	3	3	2	2	99	99				99	99	12	0.1	30	30	20	20	99	99				99	99	4	20000
16	10		99	4	2	3	2	1	2	2	99	200		99	20	60	35	12	35	200	12	99	22000	4	4	4	4	99	99				99	99	20	0.1	25	25	25	25	99	99				99	99	4	20000
17	2		99	1	3	2	99	3	99	99	99	200		99	20	60	50	99	35	99	99	99	23000	3	3	3	3	99	99				99	99	20	0.1	25	25	25	25	99	99				99	99	4	12000
18	3.5		99	4	2	2	2	1	1	2	99	200		99	25	65	30	20	35	10	20	99	18000	6	6	3	3	99	99				99	99	1.5	0.2	35	35	35	35	99	99				99	99	15	15000
19	2.5		2.5	1	1	8	4	1	2	4	99	50		1000	23	60	20	20	25	200	15	99	20000	4	4	4	4	99	99				99	99	24	0.1	30	30	30	30	99	99				99	99	5	15000
20	4		99	1	1	1	1	99	99	1	99	50		99	25	50	30	15	99	99	15	99	16000	6	6	6	6	99	99				99	99	1	0.18	30	30	30	30	99	99				99	99	50	10000
21	5		1	1	1	2	2	99	1	2	5	100		400	25	50	30	45	99	200	45	1000	20000	4	4	2	2	99	99				99	4	40	0.1	35	35	40	50	99	99				99	16	50	10000
22	1		1	3	10	4	1	1	99	1	1	250		400	22	30	25	20	30	99	20	1000	15000	7	2	2	1	99	99				99	3	5	0.1	100	100	100	100	99	99				99	15	10	6000
23	15		15	2	2	2	2	2	2	2	2	100		200	25	120	50	25	50	200	25	900	24000	20	6	2	2	99	99				99	99	8	0.1	30	30	80	80	99	99				99	99	10	22000
24	2		1	2	2	5	5	3	1	5	99	100		1000	25	70	25	15	35	150	15	99	24000	4	4	4	4	99	99				99	99	2	0.2	25	25	25	25	99	99				99	99	70	15000
25	1		1	3	1	1	99	2	99	99	2	150		500	25	70	25	99	35	99	99	900	24000	2	2	10	2	99	99				99	99	1	0.2	30	30	30	30	99	99				99	99	70	20000
26	3		99	3	2	2	2	99	1	2	99	50		99	25	70	25	20	99	200	20	99	24000	6	7	5	5	99	99				99	99	4	0.1	100	50	50	50	99	99				99	99	5	14000
27	5		99	2	99	1	99	99	1	99	99	50		99	25	99	25	99	99	150	99	99	15000	7	6	6	3	99	99				99	99	4	0.2	100	50	50	50	99	99				99	99	5	10000
28	5		99	2	1	99	1	99	1	99	99	50		99	22	80	99	25	99	180	99	99	14000	10	7	7	7	99	1				99	1	4	0.1	50	50	50	50	99	140				99	25	5	10000
29	3		99	2	1	3	2	99	99	99	99	50		99	25	70	40	20	99	99	99	99	16000	10	10	5	5	99	99				99	99	8	0.2	100	50	50	50	99	99				99	99	5	13000
30	1.5		99	3	99	1	2	99	99	99	99	50		99	25	99	60	30	99	99	99	99	12000	6	4	4	4	99	99				99	99	3	0.2	30	50	30	30	99	99				99	99	8	10000
31	4		99	3	99	1	2	1	99	2	99	50		99	25	99	25	40	55	99	40	99	10000	10	6	6	6	99	99				99	99	10	0.15	50	50	50	25	99	99				99	99	8	5000
32	2		2	1	1	1	2	1	1	1	1.5	50		100	30	70	30	20	20	150	20	1000	20000	10	5	1	1	0.5	1				99	2	2	0.2	30	30	150	80	180	150				99	145	25	15000
33	3		99	2	1	2	2	2	2	2	99	50		99	25	50	26	25	50	50	25	99	15000	6	2	6	2	99	99				99	2	5	0.2	25	20	25	25	99	99				99	80	5	12000
34	4		99	2	1	1	1	1	1	1	99	50		99	25	120	25	30	35	180	30	99	16000	4	3	3	3	99	99				99	4	5	0.2	30	30	30	30	99	99				99	30	6	12000
35	8		99	4	2	8	4	6	2	4	99	50		99	25	55	25	20	30	200	20	99	12000	6	6	6	8	99	99				99	99	5	0.3	30	30	30	20	99	99				99	99	6	7000
36	2		99	4	4	4	6	4	1	6	99	50		99	25	50	40	15	25	30	15	99	16000	10	6	6	5	99	99				99	99	4	0.2	25	25	25	25	99	99				99	99	10	12000
37	4		99	3	1	1	1	99	99	1	99	300		99	25	70	25	15	99	99	15	99	15000	5	5	5	6	99	99				99	99	1	0.2	30	30	30	20	99	99				99	99	70	14000
38	3		99	2	1	2	1	1	2	1	99	50		99	25	70	30	15	40	150	15	99	16000	4	4	4	4	99	99				99	99	4	0.2	80	80	30	30	99	99				99	99	10	12000
39	4		99	2	1	2	2	1	1	2	99	50		99	25	100	30	25	60	150	25	99	15000	6	6	6	8	99	99				99	99	1	0.2	30	30	30	30	99	99				99	99	60	13000
40	6		99	15	3	2	5	4	1	5	99	50		99	25	70	30	50	25	200	15	99	15000	6	6	6	6	99	99				99	99	1	0.2	30	30	30	25	99	99				99	99	70	10000
41	2		99	2	99	2	4	2	3	99	99	200		99	25	99	30	50	50	150	99	99	15000	3	3	3	2	99	99				99	99	4	0.2	30	30	30	25	99	99				99	99	10	14000
42	2		99	3	99	3	3	3	2	3	99	200		99	25	99	30	25	50	150	25	99	15000	4	4	4	2	99	99				99	99	6	0.2	30	30	30	30	99	99				99	99	6	12000
43	2		99	1	99	99	99	99	99	99	99	50		99	25	99	99	99	99	99	99	99	20000	3	3	3	4	99	99				99	99	4	0.2	30	30	30	40	99	99				99	99	10	15000
44	5		99	1	1	1	2	99	1	2	99	50		99	25	70	40	25	99	200	25	99	20000	4	4	4	2	99	99				99	99	4	0.2	30	30	30	30	99	99				99	99	10	12000
45	5		99	2	1	1	99	99	99	99	99	50		99	25	100	30	99	99	99	99	99	12000	3	3	3	4	99	99				99	99	6	0.2	30	30	25	40	99	99				99	99	10	10000
46	5		99	5	1	1	4	99	99	4	99	50		99	25	60	15	30	99	99	30	99	15000	3	3	3	2	99	99				99	99	5	0.2	30	30	30	20	99	99				99	99	10	12000
47	3		99	2	99	1	2	99	1	2	99	70		99	25	99	30	15	99	150	15	99	12000	4	4	4	3	99	99				99	99	5	0.2	30	30	30	30	99	99				99	99	5	8000
48	3		99	1	1	1	1	1	1	1	2	100		99	25	120	50	25	50	200	15	900	24000	10	4	6	6	99	99				99	99	8	0.1	30	30	30	30	99	99				99	99	10	22000
49	3		99	1	1	1	1	1	1	1	2	100		99	25	120	50	25	50	200	15	900	24000	10	4	6	6	99	99				99	99	8	0.1	30	30	30	30	99	99				99	99	10	22000
50	3		99	1	1	1	1	1	1	1	2	100		99	25	120	50	25	50	200	15	900	24000	10	4	6	6	99	99				99	99	8	0.1	30	30	30	30	99	99				99	99	10	22000
51	3		99	1	1	1	1	1	1	1	2	100		99	25	120	50	25	50	200	15	900	24000	10	4	6	6	99	99				99	99	8	0.1	30	30	30	30	99	99				99	99	10	22000
52	3		99	1	1	1	1	1	1	1	2	100		99	25	120	50	25	50	200	15	900	24000	10	4	6	6	99	99				99	99	8	0.1	30	30	30	30	99	99				99	99	10	22000
53	3		99	1	1	1	1	1	1	1	2	100		99	25	120	50	25	50	200	15	900	24000	10	4	6	6	99	99				99	99	8	0.1	30	30	30	30	99	99				99	99	10	22000
54	3		99	1	1	1	1	1	1	1	2	100		99	25	120	50	25	50	200	15	900	24000	10	4	6	6	99	99				99	99	8	0.1	30	30	30	30	99	99				99	99	10	22000
55	3		99	1	1	1	1	1	1	1	2	100		99	25	120	50	25	50	200	15	900	24000	10	4	6	6	99	99				99	99	8	0.1	30	30	30	30	99	99				99	99	10	22000
56	3		99	1	1	1	1	1	1	1	2	100		99	25	120	50	25	50	200	15	900	24000	10	4	6	6	99	99				99	99	8	0.1	30	30	30	30	99	99				99	99	10	22000
57	3		99	1	1	1	1	1	1	1	2	100		99	25	120	50	25	50	200	15	900	24000	10	4	6	6	99	99				99	99	8	0.1	30	30	30	30	99	99				99	99	10	22000
58	3		99	1	1	1	1	1	1	1	2	100		99	25	120	50	25	50	200	15	900	24000	10	4	6	6	99	99				99	99	8	0.1	30	30	30	30	99	99				99	99	10	22000
59	3		99	1	1	1	1	1	1	1	2	100		99	25	120	50	25	50	200	15	900	24000	10	4	6	6	99	99				99	99	8	0.1	30	30	30	30	99	99				99	99	10	22000
60	3		99	1	1	1	1	1	1	1	2	100		99	25	120	50	25	50	200	15	900	24000	10	4	6	6	99	99				99	99	8	0.1	30	30	30	30	99	99				99	99	10	22000
61	3		99	1	1	1	1	1	1	1	2	100		99	25	120	50	25	50	200	15	900	24000	10	4	6	6	99	99				99	99	8	0.1	30	30	30	30	99	99				99	99	10	22000
62	3		99	1	1	1	1	1	1	1	2	100		99	25	120	50	25	50	200	15	900	24000	10	4	6	6	99	99				99	99	8	0.1	30	30	30	30	99	99				99	99	10	22000
63	3		99	1	1	1	1	1	1	1	2	100		99	25	120	50	25	50	200	15	900	24000	10	4	6	6	99	99				99	99	8	0.1	30	30	30	30	99	99				99	99	10	22000
64	3		99	1	1	1	1	1	1	1	2	100		99	25	120	50	25	50	200	15	900	24000	10	4	6	6	99	99				99	99	8	0.1	30	30	30	30	99	99				99	99	10	22000
65	3		99	1	1	1	1	1	1	1	2	100		99	25	120	50	25	50	200	15	900	24000	10	4	6	6	99	99				99	99	8	0.1	30	30	30	30	99	99				99	99	10	22000
66	3		99	1	1	1	1	1	1	1	2	100		99	25	120	50	25	50	200	15	900	24000	10	4	6	6	99	99				99	99	8	0.1	30	30	30	30	99	99				99	99	10	22000
67	3		99	1	1	1	1	1	1	1	2	100		99	25	120	50	25	50	200	15	900	24000	10	4	6	6	99	99				99	99	8	0.1	30	30	30	30	99	99				99	99	10	22000
68	3		99	1	1	1	1	1	1	1	2	100		99	25	120	50	25	50	200	15	900	24000	10	4	6	6	99	99				99	99	8	0.1	30	30	30	30	99	99				99	99	10	22000
69	3		99	1	1	1	1	1	1	1	2	100		99	25	120	50	25	50	200	15	900	24000	10	4	6	6	99	99				99	99	8	0.1	30	30	30	30	99	99				99	99	10	22000
70	3		99	1	1	1	1	1	1	1	2	100		99	25	120	50	25	50	200	15	900	24000	10	4	6	6	99	99				99	99	8	0.1	30	30	30	30	99	99				99	99	10	22000
71	3		99	1	1	1	1	1	1	1	2	100		99	25	120	50	25	50	200	15	900	24000	10	4	6	6	99	99				99	99	8	0.1	30	30	30	30	99	99				99	99	10	22000
72	3		99	1	1	1	1	1	1	1	2	100		99	25	120	50	25	50	200	15	900	24000	10	4	6	6	99	99				99	99	8	0.1	30	30	30	30	99	99				99	99	10	22000
73	3		3	3	99	3	1	1	99	99	3	100		350	24	99	25	15	40	99	99	1000	20000	10	99	4	99	99	99				99	99	20	0.2	100	99	50	99	99	99				99	99	4	19000
74	1		99	2	99	99	99	99	99	99	99	100		99	25	99	99	99	99	99	99	99	15000	4	4	4	4	99	99				99	99	4	0.1	100	100	100	20	99	99				99	99	5	15000
75	1		99	3	1	2	99	2	99	99	1	90		200	25	60	30	99	20	99	99	1000	14400	5	5	5	5	99	99				99	99	2	0.2	100	100	20	20	99	99				99	99	15	9000
76	1		1	4	1	1	99	1	99	99	1	100		200	25	50	30	99	40	99	99	950	15000	10	10	1	5	99	99				2	99	1.5	0.1	50	50	50	50	99	99				25	99	5	15000
77	5		99	4	99	1	4	1	99	99	99	100		99	25	99	25	15	40	99	99	99	10000	10	10	2	5	99	99				99	99	4	0.1	50	50	50	50	99	99				99	99	5	7000
78	5		99	2	2	99	2	99	99	99	99	100		99	25	99	30	99	35	99	99	99	24000	8	8	6	6	99	99				99	99	4	0.2	50	50	50	30	99	99				99	99	8	20000
79	10		2	2	2	2	2	3	99	1	1	100		150	24	25	20	20	14	99	20	1000	24000	8	8	5	5	3	3				99	5	4	0.1	100	100	40	100	80	80				99	20	5	12000
80	7		7	1	7	8	3	2	5	1	99	100		100	25	50	60	5	60	220	15	99	20000	5	5	5	2	2	2				2	4	2	0.2	60	60	60	60	75	75				80	22	50	19000
81	2		2	3	1	1	1	99	99	99	99	100		100	25	50	60	5	99	99	99	99	20000	5	5	5	2	2	2				2	4	2	0.2	60	60	60	60	75	75				80	22	50	19000
82	3		3	2	2	2	2	2	2	2	99	100		50	25	70	12	10	120	200	10	99	20000	5	5	5	2	0.5	5				99	1	1	0.2	25	25	25	25	75	75				99	160	50	18000
83	2.5		2.5	1	2	1	1	1	1	1	2.5	100		300	25	35	25	15	26	60	10	850	11000	10	10	6	2	99	99				99	99	3	0.2	30	30	30	30	99	99				99	99	6	8000
84	5		5	5	2	2	5	2	2	2	99	100		450	22	75	25	10	24	150	10	99	10000	10	10	5	5	99	99				99	99	3	0.2	40	40	40	20	99	99				99	99	6	8000
85	3		3	10	3	3	3	4	2	5	1	100		1200	25	65	25	15	30	60	10	1000	12000	3	10	5	5	3	3				99	3	4	0.2	200	50	50	50	80	80				99	25	15	8000
86	1		1	2	2	5	99	1	2	3	99	100		1000	30	17	5	99	25	62.5	18	99	12000	6	6	6	4	99	99			4	99	99	4	0.2	30	30	30	30	99	99			12	99	99	5	8000
87	1		1	2	99	2	1	1	1	1	99	100		1000	25	99	25	5	30	5	25	99	20000	5	5	5	5	99	99				99	99	8	0.2	30	30	30	30	99	99				99	99	5	15000
88	2		2	2	3	2	2	2	2	1	99	400		340	30	150	30	20	25	200	15	99	12000	10	10	10	5	99	2	3	2		99	99	6	0.2	30	30	30	30	99	20	18	150		99	99	8	10000
89	1		1	2	1	2	1	99	1	2	99	200		400	24	20	35	30	99	200	20	99	12000	4	4	4	4	2	10			2	2	2	2	0.2	25	25	25	25	28	40			28	28	28	30	8000
90	5		5	1	1	1	1	1	1	1	1	100		1200	25	65	25	15	30	60	30	1000	12000	4	10	10	8	3	3				99	3	4	0.2	150	50	50	50	80	80				99	25	15	7000
91	5		5	1	1	1	1	1	1	1	1	100		1200	25	65	25	15	30	60	30	1000	12000	4	10	10	8	3	3				99	3	4	0.2	150	50	50	50	80	80				99	25	15	7000
92	5		5	1	1	1	1	1	1	1	1	100		1200	25	65	25	15	30	60	30	1000	12000	4	10	10	8	3	3				99	3	4	0.2	150	50	50	50	80	80				99	25	15	7000
93	5		5	1	1	1	1	1	1	1	1	100		1200	25	65	25	15	30	60	30	1000	12000	4	10	10	8	3	3				99	3	4	0.2	150	50	50	50	80	80				99	25	15	7000
94	5		5	1	1	1	1	1	1	1	1	100		1200	25	65	25	15	30	60	30	1000	12000	4	10	10	8	3	3				99	3	4	0.2	150	50	50	50	80	80				99	25	15	7000
95	5		5	1	1	1	1	1	1	1	1	100		1200	25	65	25	15	30	60	30	1000	12000	4	10	10	8	3	3				99	3	4	0.2	150	50	50	50	80	80				99	25	15	7000
96	5		5	1	1	1	1	1	1	1	1	100		1200	25	65	25	15	30	60	30	1000	12000	4	10	10	8	3	3				99	3	4	0.2	150	50	50	50	80	80				99	25	15	7000
97	5		5	1	1	1	1	1	1	1	1	100		1200	25	65	25	15	30	60	30	1000	12000	4	10	10	8	3	3				99	3	4	0.2	150	50	50	50	80	80				99	25	15	7000
98	5		5	1	1	1	1	1	1	1	1	100		1200	25	65	25	15	30	60	30	1000	12000	4	10	10	8	3	3				99	3	4	0.2	150	50	50	50	80	80				99	25	15	7000
99	5		5	1	1	1	1	1	1	1	1	100		1200	25	65	25	15	30	60	30	1000	12000	4	10	10	8	3	3				99	3	4	0.2	150	50	50	50	80	80				99	25	15	7000
100	5		5	1	1	1	1	1	1	1	1	100		1200	25	65	25	15	30	60	30	1000	12000	4	10	10	8	3	3				99	3	4	0.2	150	50	50	50	80	80				99	25	15	7000
101	5		5	1	1	1	1	1	1	1	1	100		1200	25	65	25	15	30	60	30	1000	12000	4	10	10	8	3	3				99	3	4	0.2	150	50	50	50	80	80				99	25	15	7000
102	5		5	1	1	1	1	1	1	1	1	100		1200	25	65	25	15	30	60	30	1000	12000	4	10	10	8	3	3				99	3	4	0.2	150	50	50	50	80	80				99	25	15	7000
103	5		5	1	1	1	1	1	1	1	1	100		1200	25	65	25	15	30	60	30	1000	12000	4	10	10	8	3	3				99	3	4	0.2	150	50	50	50	80	80				99	25	15	7000
104	5		5	1	1	1	1	1	1	1	1	100		1200	25	65	25	15	30	60	30	1000	12000	4	10	10	8	3	3				99	3	4	0.2	150	50	50	50	80	80				99	25	15	7000
105	5		5	1	1	1	1	1	1	1	1	100		1200	25	65	25	15	30	60	30	1000	12000	4	10	10	8	3	3				99	3	4	0.2	150	50	50	50	80	80				99	25	15	7000
106	5		5	1	1	1	1	1	1	1	1	100		1200	25	65	25	15	30	60	30	1000	12000	4	10	10	8	3	3				99	3	4	0.2	150	50	50	50	80	80				99	25	15	7000
107	5		5	1	1	1	1	1	1	1	1	100		1200	25	65	25	15	30	60	30	1000	12000	4	10	10	8	3	3				99	3	4	0.2	150	50	50	50	80	80				99	25	15	7000
108	5		5	1	1	1	1	1	1	1	1	100		1200	25	65	25	15	30	60	30	1000	12000	4	10	10	8	3	3				99	3	4	0.2	150	50	50	50	80	80				99	25	15	7000
109	5		5	1	1	1	1	1	1	1	1	100		1200	25	65	25	15	30	60	30	1000	12000	4	10	10	8	3	3				99	3	4	0.2	150	50	50	50	80	80				99	25	15	7000
110	5		5	1	1	1	1	1	1	1	1	100		1200	25	65	25	15	30	60	30	1000	12000	4	10	10	8	3	3				99	3	4	0.2	150	50	50	50	80	80				99	25	15	7000
111	5		5	1	1	1	1	1	1	1	1	100		1200	25	65	25	15	30	60	30	1000	12000	4	10	10	8	3	3				99	3	4	0.2	150	50	50	50	80	80				99	25	15	7000
112	5		5	1	1	1	1	1	1	1	1	100		1200	25	65	25	15	30	60	30	1000	12000	4	10	10	8	3	3				99	3	4	0.2	150	50	50	50	80	80				99	25	15	7000
113	5		5	1	1	1	1	1	1	1	1	100		1200	25	65	25	15	30	60	30	1000	12000	4	10	10	8	3	3				99	3	4	0.2	150	50	50	50	80	80				99	25	15	7000
114	5		5	1	1	1	1	1	1	1	1	100		1200	25	65	25	15	30	60	30	1000	12000	4	10	10	8	3	3				99	3	4	0.2	150	50	50	50	80	80				99	25	15	7000
115	5		5	1	1	1	1	1	1	1	1	100		1200	25	65	25	15	30	60	30	1000	12000	4	10	10	8	3	3				99	3	4	0.2	150	50	50	50	80	80				99	25	15	7000
116	5		5	1	1	1	1	1	1	1	1	100		1200	25	65	25	15	30	60	30	1000	12000	4	10	10	8	3	3				99	3	4	0.2	150	50	50	50	80	80				99	25	15	7000
117	5		5	1	1	1	1	1	1	1	1	100		1200	25	65	25	15	30	60	30	1000	12000	4	10	10	8	3	3				99	3	4	0.2	150	50	50	50	80	80				99	25	15	7000
118	5		5	1	1	1	1	1	1	1	1	100		1200	25	65	25	15	30	60	30	1000	12000	4	10	10	8	3	3				99	3	4	0.2	150	50	50	50	80	80				99	25	15	7000
119	5		5	1	1	1	1	1	1	1	1	100		1200	25	65	25	15	30	60	30	1000	12000	4	10	10	8	3	3				99	3	4	0.2	150	50	50	50	80	80				99	25	15	7000
120	20		20	1	1	1	1	1	1	1	30	300		750	20	70	30	20	48	120	20	800	20000	7	7	4	2	2	3				1.5	2	5	0.2	50	50	30	20	70	70				40	65	20	18000
121	20		20	1	1	1	1	1	1	1	30	300		750	20	70	30	20	48	120	20	800	20000	7	7	4	2	2	3				1.5	2	5	0.2	50	50	30	20	70	70				40	65	20	18000
122	20		20	1	1	1	1	1	1	1	30	300		750	20	70	25	20	48	120	20	800	20000	7	7	4	2	2	3				1.5	2	5	0.2	50	50	30	20	70	70				40	65	20	18000
123	20		20	1	1	1	1	1	1	1	30	300		750	20	70	30	20	48	120	20	800	20000	7	7	4	2	2	3				1.5	2	5	0.2	50	50	30	20	70	70				40	65	20	18000
124	20		20	1	1	1	1	1	1	1	30	300		750	20	70	20	20	48	120	20	800	20000	7	7	4	2	2	3				1.5	2	5	0.2	50	50	30	20	70	70				40	65	20	18000
125	20		20	1	1	1	1	1	1	1	30	300		750	20	70	60	20	48	120	20	800	20000	7	7	4	2	2	3				1.5	2	5	0.2	50	50	30	20	70	70				40	65	20	18000
126	20		20	1	1	1	1	1	1	1	30	300		750	20	70	60	20	48	120	20	800	20000	7	7	4	2	2	3				1.5	2	5	0.2	50	50	30	20	70	70				40	65	20	18000
127	20		20	1	1	1	1	1	1	1	30	300		750	20	70	12	20	48	120	20	800	20000	7	7	4	2	2	3				1.5	2	5	0.2	50	50	30	20	70	70				40	65	20	18000
128	20		20	1	1	1	1	1	1	1	30	300		750	20	70	25	20	48	120	20	800	20000	7	7	4	2	2	3				1.5	2	5	0.2	50	50	30	20	70	70				40	65	20	18000
129	20		20	1	1	1	1	1	1	1	30	300		750	20	70	25	20	48	120	20	800	20000	7	7	4	2	2	3				1.5	2	5	0.2	50	50	30	20	70	70				40	65	20	18000
130	20		20	1	1	1	1	1	1	1	30	300		750	20	70	25	20	48	120	20	800	20000	7	7	4	2	2	3				1.5	2	5	0.2	50	50	30	20	70	70				40	65	20	18000
131	20		20	1	1	1	1	1	1	1	30	300		750	20	70	5	20	48	120	20	800	20000	7	7	4	2	2	3				1.5	2	5	0.2	50	50	30	20	70	70				40	65	20	18000
132	20		20	1	1	1	1	1	1	1	30	300		750	20	70	25	20	48	120	20	800	20000	7	7	4	2	2	3				1.5	2	5	0.2	50	50	30	20	70	70				40	65	20	18000
133	20		20	1	1	1	1	1	1	1	30	300		750	20	70	30	20	48	120	20	800	20000	7	7	4	2	2	3				1.5	2	5	0.2	50	50	30	20	70	70				40	65	20	18000
134	20		20	1	1	1	1	1	1	1	30	300		750	20	70	35	20	48	120	20	800	20000	7	7	4	2	2	3				1.5	2	5	0.2	50	50	30	20	70	70				40	65	20	18000
135	20		20	1	1	1	1	1	1	1	30	300		750	20	70	25	20	48	120	20	800	20000	7	7	4	2	2	3				1.5	2	5	0.2	50	50	30	20	70	70				40	65	20	18000
136	20		20	1	1	1	1	1	1	1	30	300		750	20	70	25	20	48	120	20	800	20000	7	7	4	2	2	3				1.5	2	5	0.2	50	50	30	20	70	70				40	65	20	18000
137	20		20	1	1	1	1	1	1	1	30	300		750	20	70	25	20	48	120	20	800	20000	7	7	4	2	2	3				1.5	2	5	0.2	50	50	30	20	70	70				40	65	20	18000
138	20		20	1	1	1	1	1	1	1	30	300		750	20	70	5	20	48	120	20	800	20000	7	7	4	2	2	3				1.5	2	5	0.2	50	50	30	20	70	70				40	65	20	18000
139	20		20	1	1	1	1	1	1	1	30	300		750	20	70	25	20	48	120	20	800	20000	7	7	4	2	2	3				1.5	2	5	0.2	50	50	30	20	70	70				40	65	20	18000
140	2		99	3	99		2	1	99	99	99	150		99	22	99	99	20	35	99	99	99	20000	4	4	4	1	99	99				99	99	4	0.1	50	50	50	50	99	99				99	99	10	15000
141	1		99	4	99	1	3	4	2	1	99	250		99	20	99	25	22	40	60	10	99	20000	4	8	4	3	99	99				99	5	4	0.1	50	50	50	50	99	99				99	30	10	18000
142	1.5		99	3	2	99	2	2	1	2	99	250		99	20	55	99	20	48	120	20	99	20000	7	6	4	2	99	99				1.5	2	5	0.2	50	50	30	50	99	99				40	65	20	18000
143	1		99	2	2	99	99	2	1	99	99	250		99	20	100	99	99	35	5	99	99	24000	2	3	2	3	1	2				99	99	1	0.1	200	130	100	130	49	75				99	99	40	20000
144	1		99	1	1	2	2	2	3	99	99	150		99	25	70	25	15	40	200	99	99	20000	4	10	10	10	5	99				99	99	1	0.2	100	30	50	25	99	99				99	99	60	20000
145	4		99	2	2	99	99	2	3	99	99	300		99	30	50	99	99	70	30	99	99	16000	4	4	2	2	1	2				1.5	2	2	0.1	150	100	100	50	49	75				40	65	5	10000
146	6		99	1	2	1	2	2	2	99	99	150		99	20	200	30	30	25	200	99	99	20000	4	4	4	2	4	99				99	99	5	0.1	100	100	100	100	45	99				99	99	6	15000
147	1		99	3	1	2	1	1	99	99	99	200		99	20	70	15	5	40	99	99	99	20000	4	7	3	5	99	99				99	99	1	0.1	50	50	50	50	99	99				99	99	20	18000
148	4		99	4	2	6	4	2	1	99	99	125		99	20	15	20	20	20	150	99	99	20000	4	4	4	4	15	5				99	99	10	0.1	50	50	50	50	25	25				99	99	15	15000
149	3		99	2	1	1	2	2	99	99	99	200		99	22	60	40	40	50	99	99	99	16000	2	2	2	2	1	2				2	8	4	0.2	200	200	200	100	75	75				75	45	8	12000
150	2.5		99	4	1	99	2	4	3	3	99	200		99	22	75	99	35	25	70	10	99	16000	4	4	5	2	99	99				2	4	8	0.1	60	60	60	60	99	99				45	35	8	10000
151	4		4	2	2	99	2	2	10	2	99	150		250	25	70	99	25	35	5	10	99	16000	4	4	4	4	0.5	1				4	2	10	0.06	60	60	60	25	75	140				25	60	5	12000
152	5		1	3	2	4	3	99	99	99	5	200		120	22	40	25	25	99	99	99	900	24000	8	4	2	2	99	99				99	2	15	0.1	50	50	50	25	99	99				99	45	3	18000
153	3		99	3	99	1	2	1	99	99	3	200		99	22	99	40	40	50	99	99	1000	20000	4	6	4	4	99	99				99	16	10	0.1	50	50	50	50	99	99				99	22	10	18000
154	2		99	2	99	99	1	1	99	99	99	200		99	20	99	99	50	30	99	99	99	16000	6	8	5	2	1	1				99	4	5	0.1	50	50	50	40	100	100				99	100	6	10000
155	0.5		99	2	99	99	2	99	1	99	99	100		99	20	99	99	20	99	30	99	99	10000	4	4	3	3	99	99	1			99	2	2	0.1	50	50	30	30	99	99	15			99	50	10	7000
156	0.5		99	3	99	99	1	99	99	99	99	120		99	22	99	99	15	99	99	99	99	8000	4	4	4	4	1	1				1	2	4	0.05	50	50	20	20	70	75				65	70	5	7000
157	0.75		99	2	99	99	4	1	1	99	99	200		99	25	99	99	18	25	20	99	99	18000	5	5	2	2	1	1				99	99	4	0.1	50	50	45	45	100	150				99	99	5	16000
158	4		99	4	3	4	6	4	2	99	99	200		99	22	70	40	30	60	200	99	99	16000	5	5	5	5	1	1				1	2	1	0.1	40	40	40	40	70	75				70	150	100	8000
159	2		99	4	2	3	1	1	20	1	99	200		99	30	70	25	20	50	5	20	99	20000	10	10	5	5	1	1				99	99	8	0.2	50	50	50	50	100	100				99	99	10	12000
160	2		99	3	2	2	5	3	15	2	99	200		99	22	75	30	15	45	5	15	99	26000	10	6	8	8	1	2				99	4	1	0.05	50	50	20	20	100	100				99	70	250	20000
161	25		25	1	1	1	1	1	1	1	25	200		200	22	75	25	20	45	150	25	800	24000	10	10	5	5	1	2				3	8	10	0.05	40	40	40	40	85	90				45	65	40	20000
162	25		25	1	1	1	1	1	1	1	25	200		200	22	75	25	20	45	150	25	800	24000	10	10	5	5	1	2				3	8	10	0.05	40	40	40	40	85	90				45	65	40	20000
163	25		25	1	1	1	1	1	1	1	25	200		200	22	75	25	20	45	150	25	800	24000	10	10	5	5	1	2				3	8	10	0.05	40	40	40	40	85	90				45	65	40	20000
164	25		25	1	1	1	1	1	1	1	25	200		200	22	75	25	20	45	150	25	800	24000	10	10	5	5	1	2				3	8	10	0.05	40	40	40	40	85	90				45	65	40	20000
165	25		25	1	1	1	1	1	1	1	25	200		200	22	75	25	20	45	150	25	800	24000	10	10	5	5	1	2				3	8	10	0.05	40	40	40	40	85	90				45	65	40	20000
166	25		25	1	1	1	1	1	1	1	25	200		200	22	75	25	20	45	150	25	800	24000	10	10	5	5	1	2				3	8	10	0.05	40	40	40	40	85	90				45	65	40	20000
167	25		25	1	1	1	1	1	1	1	25	200		200	22	75	25	20	45	150	25	800	24000	10	10	5	5	1	2				3	8	10	0.05	40	40	40	40	85	90				45	65	40	20000
168	25		25	1	1	1	1	1	1	1	25	200		200	22	75	25	20	45	150	25	800	24000	10	10	5	5	1	2				3	8	10	0.05	40	40	40	40	85	90				45	65	40	20000
169	25		25	1	1	1	1	1	1	1	25	200		200	22	75	25	20	45	150	25	800	24000	10	10	5	5	1	2				3	8	10	0.05	40	40	40	40	85	90				45	65	40	20000
170	25		25	1	1	1	1	1	1	1	25	200		200	22	75	25	20	45	150	25	800	24000	10	10	5	5	1	2				3	8	10	0.05	40	40	40	40	85	90				45	65	40	20000
171	25		25	1	1	1	1	1	1	1	25	200		200	22	75	25	20	45	150	25	800	24000	10	10	5	5	1	2				3	8	10	0.05	40	40	40	40	85	90				45	65	40	20000
172	25		25	1	1	1	1	1	1	1	25	200		200	22	75	25	20	45	150	25	800	24000	10	10	5	5	1	2				3	8	10	0.05	40	40	40	40	85	90				45	65	40	20000
173	25		25	1	1	1	1	1	1	1	25	200		200	22	75	25	20	45	150	25	800	24000	10	10	5	5	1	2				3	8	10	0.05	40	40	40	40	85	90				45	65	40	20000
174	25		25	1	1	1	1	1	1	1	25	200		200	22	75	25	20	45	150	25	800	24000	10	10	5	5	1	2				3	8	10	0.05	40	40	40	40	85	90				45	65	40	20000
175	25		25	1	1	1	1	1	1	1	25	200		200	22	75	25	20	45	150	25	800	24000	10	10	5	5	1	2				3	8	10	0.05	40	40	40	40	85	90				45	65	40	20000
176	25		25	1	1	1	1	1	1	1	25	200		200	22	75	25	20	45	150	25	800	24000	10	10	5	5	1	2				3	8	10	0.05	40	40	40	40	85	90				45	65	40	20000
177	25		25	1	1	1	1	1	1	1	25	200		200	22	75	25	20	45	150	25	800	24000	10	10	5	5	1	2				3	8	10	0.05	40	40	40	40	85	90				45	65	40	20000
178	25		25	1	1	1	1	1	1	1	25	200		200	22	75	25	20	45	150	25	800	24000	10	10	5	5	1	2				3	8	10	0.05	40	40	40	40	85	90				45	65	40	20000
179	25		25	1	1	1	1	1	1	1	25	200		200	22	75	25	20	45	150	25	800	24000	10	10	5	5	1	2				3	8	10	0.05	40	40	40	40	85	90				45	65	40	20000
180	25		25	1	1	1	1	1	1	1	25	200		200	22	75	25	20	45	150	25	800	24000	10	10	5	5	1	2				3	8	10	0.05	40	40	40	40	85	90				45	65	40	20000
181	25		25	1	1	1	1	1	1	1	25	200		200	22	75	25	20	45	150	25	800	24000	10	10	5	5	1	2				3	8	10	0.05	40	40	40	40	85	90				45	65	40	20000
182	25		25	1	1	1	1	1	1	1	25	200		200	22	75	25	20	45	150	25	800	24000	10	10	5	5	1	2				3	8	10	0.05	40	40	40	40	85	90				45	65	40	20000
183	25		25	1	1	1	1	1	1	1	25	200		200	22	75	25	20	45	150	25	800	24000	10	10	5	5	1	2				3	8	10	0.05	40	40	40	40	85	90				45	65	40	20000
184	25		25	1	1	1	1	1	1	1	25	200		200	22	75	25	20	45	150	25	800	24000	10	10	5	5	1	2				3	8	10	0.05	40	40	40	40	85	90				45	65	40	20000
185	25		25	1	1	1	1	1	1	1	25	200		200	22	75	25	20	45	150	25	800	24000	10	10	5	5	1	2				3	8	10	0.05	40	40	40	40	85	90				45	65	40	20000
186	25		25	1	1	1	1	1	1	1	25	200		200	22	75	25	20	45	150	25	800	24000	10	10	5	5	1	2				3	8	10	0.05	40	40	40	40	85	90				45	65	40	20000
187	25		25	1	1	1	1	1	1	1	25	200		200	22	75	25	20	45	150	25	800	24000	10	10	5	5	1	2				3	8	10	0.05	40	40	40	40	85	90				45	65	40	20000
188	25		25	1	1	1	1	1	1	1	25	200		200	22	75	25	20	45	150	25	800	24000	10	10	5	5	1	2				3	8	10	0.05	40	40	40	40	85	90				45	65	40	20000
189	25		25	1	1	1	1	1	1	1	25	200		200	22	75	25	20	45	150	25	800	24000	10	10	5	5	1	2				3	8	10	0.05	40	40	40	40	85	90				45	65	40	20000
190	25		25	1	1	1	1	1	1	1	25	200		200	22	75	25	20	45	150	25	800	24000	10	10	5	5	1	2				3	8	10	0.05	40	40	40	40	85	90				45	65	40	20000
191	25		25	1	1	1	1	1	1	1	25	200		200	22	75	25	20	45	150	25	800	24000	10	10	5	5	1	2				3	8	10	0.05	40	40	40	40	85	90				45	65	40	20000
192	25		25	1	1	1	1	1	1	1	25	200		200	22	75	25	20	45	150	25	800	24000	10	10	5	5	1	2				3	8	10	0.05	40	40	40	40	85	90				45	65	40	20000
193	25		25	1	1	1	1	1	1	1	25	200		200	22	75	25	20	45	150	25	800	24000	10	10	5	5	1	2				3	8	10	0.05	40	40	40	40	85	90				45	65	40	20000
194	25		25	1	1	1	1	1	1	1	25	200		200	22	75	25	20	45	150	25	800	24000	10	10	5	5	1	2				3	8	10	0.05	40	40	40	40	85	90				45	65	40	20000
195	25		25	1	1	1	1	1	1	1	25	200		200	22	75	25	20	45	150	25	800	24000	10	10	5	5	1	2				3	8	10	0.05	40	40	40	40	85	90				45	65	40	20000
196	25		25	1	1	1	1	1	1	1	25	200		200	22	75	25	20	45	150	25	800	24000	10	10	5	5	1	2				3	8	10	0.05	40	40	40	40	85	90				45	65	40	20000
197	25		25	1	1	1	1	1	1	1	25	200		200	22	75	25	20	45	150	25	800	24000	10	10	5	5	1	2				3	8	10	0.05	40	40	40	40	85	90				45	65	40	20000
198	25		25	1	1	1	1	1	1	1	25	200		200	22	75	25	20	45	150	25	800	24000	10	10	5	5	1	2				3	8	10	0.05	40	40	40	40	85	90				45	65	40	20000
199	25		25	1	1	1	1	1	1	1	25	200		200	22	75	25	20	45	150	25	800	24000	10	10	5	5	1	2				3	8	10	0.05	40	40	40	40	85	90				45	65	40	20000
200	25		25	1	1	1	1	1	1	1	25	200		200	22	75	25	20	45	150	25	800	24000	10	10	5	5	1	2				3	8	10	0.05	40	40	40	40	85	90				45	65	40	20000
201	7.5		99	1	1	1	1	1	99	99	99	150		99	22	40	25	40	25	99	99	99	20000	5	10	5	10	99	99				99	99	6	0.05	40	40	40	40	99	99				99	99	6	15000
202	3		99	4	3	99	3	2	1	8	99	200		99	22	60	99	35	40	150	20	99	16000	5	10	2	4	1	1				99	4	4	0.1	40	40	80	80	70	75				99	80	6	12000
203	1.5		99	1	1	99	2	1	1	1	1.5	200		99	22	200	99	30	40	200	20	900	16000	10	10	5	10	1	1				99	2	10	0.1	40	40	40	40	70	75				99	15	6	10000
204	6		99	2	1	99	2	1	1	4	99	300		99	25	75	99	15	25	150	35	99	24000	10	10	5	5	1	1				1	3	8	0.1	40	0	40	50	200	200				45	45	7	13000
205	1		99	2	1	2	3	1	13	99	99	200		99	20	70	35	15	40	5	99	99	20000	4	4	10	4	1	2				2	8	20	0.1	100	100	100	100	100	100				50	40	3	18000
206	10		10	5	99	5	5	10	99	99	10	300		400	22	99	50	50	50	99	99	800	20000	4	4	2	2	2	2				99	99	8	0.05	100	100	100	100	100	100				99	50	4	19000
207	10		1	5	99	5	5	10	99	99	10	300		400	22	50	50	50	99	99	99	800	20000	8	8	5	5	2	2				99	99	8	0.05	50	50	20	20	100	100				99	50	4	19000
208	2		99	2	99	2	5	3	1	3	2	200		99	18	99	20	15	40	160	20	800	24000	8	8	6	6	99	99				99	99	48	0.05	50	50	40	40	99	99				99	99	8	12000
209	1		99	2	99	99	2	99	99	2	99	200		99	22	99	99	20	99	99	20	99	20000	2	2	2	2	1	1				2	8	4	0.05	400	200	400	200	200	200				40	40	5	17000
210	0.75		99	2	1	99	2	99	99	99	99	200		99	22	50	99	20	99	99	99	99	20000	2	2	1	2	1	1				2	8	25	0.05	400	400	200	100	75	75				40	50	5	18000
211	3		1	4	2	2	3	4	2	3	1	200		700	25	75	35	25	50	200	30	900	22000	3	3	2	3	1	2				2	4	10	0.04	300	300	50	50	67	67				35	75	7	20000
212	10		99	4	1	2	4	2	99	99	4	100		99	25	260	30	15	50	99	99	900	24000	2	1	2	10	1	1				2	8	25	0.1	200	400	50	50	75	75				70	50	5	20000
213	5		99	4	4	3	3	3	99	4	2	200		99	12	70	35	40	50	99	8	1000	25000	4	2	2	4	99	99				99	99	20	0.07	100	100	100	100	99	99				99	99	5	15000
214	0.75		99	1	99	99	1	1	1	99	99	100		99	22	99	99	15	45	85	99	99	15000	4	4	4	2	1	1				2	4	20	0.1	80	80	80	80	70	75				50	80	5	12000
215	1.5		99	2	2	4	6	1	99	99	99	200		99	22	70	25	15	45	99	99	99	10000	4	4	4	2	1	1				99	99	2	0.05	80	80	80	40	70	75				99	99	100	8000
216	20		20	6	2	6	6	3	4	99	99	200		300	25	100	25	25	50	200	99	99	23000	4	4	2	2	1	1				2	2	1	0.1	80	80	100	100	75	5				70	30	100	22000
217	2		99	5	3	2	2	99	99	99	99	200		99	25	50	35	35	99	99	99	99	20000	4	4	4	4	99	99				99	99	5	0.1	80	80	80	80	99	99				99	99	7	15000
218	6		6	1	2	1	1	3	3	1	6	200		200	22	75	25	20	45	150	25	800	16000	5	10	5	10	1	1				3	1.5	10	0.05	40	40	40	40	85	90				45	65	5	13000
219	0.5		99	2	1	1	1	99	99	99	0.5	100		99	40	99	40	20	25	99	99	1000	12000	1	1	1	1	99	99				99	8	10	0.1	100	100	50	100	99	99				99	40	4	8000
220	1		99	1	99	99	1	99	1	1	99	200		99	20	99	99	20	99	200	20	99	10000	10	10	5	5	99	99				99	10	2	0.1	25	25	25	25	99	99				99	30	6	8000
221	1		1	1	1	99	1	1	1	1	99	200		400	22	75	99	35	40	120	25	99	12000	5	6	5	5	99	99				99	4	1.5	0.15	40	50	25	25	99	99				99	30	30	8000
222	4		99	1	1	1	1	1	1	1	4	200		99	22	70	15	35	60	150	15	800	27000	5	10	5	10	1	2				99	8	20	0.2	40	40	40	40	133	133				99	50	6	22000
223	1		99	1	1	1	3	99	1	99	0.5	200		99	22	70	15	35	99	150	99	800	26000	10	10	5	10	1	2				99	8	18	0.2	40	40	40	40	133	133				99	50	6	21000
224	3		3	5	2	1	3	2	2	5	3	200		250	22	70	25	60	45	200	25	900	22000	5	12	5	3	1	2				4	6	4	0.1	40	30	40	40	70	75				35	80	6	20000
225	1		99	1	1	99	99	1	99	1	99	100		99	24	70	99	99	60	99	20	99	22000	4	4	2	2	1	1				99	6	6	0.1	80	80	80	80	70	75				99	80	12	16000
226	1.5		99	5	99	99	4	1	10	99	99	200		99	15	99	99	22	60	3	99	99	16000	4	4	2	2	0.5	0.5				99	6	6	0.1	80	80	80	80	70	75				99	80	12	10000
227	1.5		99	3	2	99	3	2	1	2	99	200		99	25	50	99	35	15	25	20	99	16000	5	4	2	4	0.25	99				99	2	4	0.05	40	80	80	80	70	99				99	80	6	14000
228	3		99	2	1	1	1	1	1	1	1	200		99	24	70	35	35	25	250	20	700	16000	5	4	2	4	99	99				99	3	1	0.05	50	100	100	100	99	99				99	70	100	14000
229	2		99	4	4	1	1	99	10	99	99	200		99	25	25	30	25	99	4	99	99	18000	5	5	5	5	1	2				99	6	48	0.1	100	100	100	25	75	75				99	25	5	15000
230	3		3	2	2	99	4	1	1	99	4	200		400	25	30	99	15	30	10	99	800	20000	8	16	6	6	99	99				1	2	6	0.1	100	50	50	30	99	99				20	15	10	16000
231	1.5		99	22	99	99	3	99	99	99	1.5	200		99	22	99	99	20	99	99	99	800	20000	10	10	4	4	99	99				99	99	30	0.1	50	50	50	50	99	99				99	99	4	19000
232	1		99	4	99	1	4	99	1	99	0.5	100		99	22	99	20	25	99	40	99	800	22000	8	6	6	6	1	2				99	1	12	0.1	50	50	50	50	100	100				99	20	5	15000
233	6		99	2	2	2	8	1	2	99	6	200		99	20	75	20	25	40	110	99	800	20000	10	10	4	4	99	99				99	2	4	0.1	50	50	50	50	99	99				99	15	5	19000
234	1		4	3	99	99	1	2	99	99	2	200		300	20	99	99	50	30	99	99	900	24000	16	4	4	4	99	99				99	99	4	0.2	50	50	50	30	99	99				99	99	4	13000
235	2		99	1	2	1	3	1	99	99	2	200		99	20	150	30	15	40	99	99	1000	26000	8	5	5	3	1	2				99	4	20	0.1	100	50	50	50	67	67				99	53	7	20000
236	2		99	1	99	2	99	1	99	99	99	200		99	18	99	99	15	99	75	99	99	18000	10	10	5	5	1	2				99	99	9	0.05	40	40	40	40	75	75				99	99	30	16000
237	1.5		99	4	99	2	2	2	1	2	1	300		99	25	99	27	20	25	100	25	1000	24000	8	7	4	4	99	1.5				99	6	20	0.05	100	50	50	50	99	200				99	40	7	20000
238	5		99	6	15	5	10	4	4	99	99	200		99	20	50	35	15	25	100	99	99	24000	4	4	2	4	1	3				99	8	10	0.05	80	80	80	80	75	75				99	45	25	18000
239	2		99	2	1	99	3	2	99	99	99	200		99	20	100	99	15	50	99	99	99	20000	2	4	2	2	1	1				3	2	4	0.1	220	40	40	40	85	90				45	65	6	15000
240	2		99	1	1	99	1	1	1	99	99	100		99	20	85	99	15	45	50	99	99	10000	4	4	4	4	99	99				99	2	2	0.1	20	20	20	20	99	99				99	15	40	8000
241	4		99	5	2	99	4	2	2	99	99	100		99	15	70	99	100	25	250	99	99	20000	6	1	5	4	99	99				99	3	10	0.1	50	20	25	80	99	99				99	240	40	10000
242	3		99	2	1	1	1	2	99	99	99	200		99	22	60	20	20	25	99	99	99	23000	2	2	4	2	0.5	2				99	8	2	0.2	200	200	80	80	150	150				99	20	50	20000
243	4		4	6	2	3	2	2	10	99	99	200		200	22	60	40	25	50	5	99	99	16000	8	8	8	8	99	2				99	8	4	0.2	100	100	100	30	99	150				99	50	8	12000
244	5		99	1	1	2	2	1	99	2	99	400		99	22	70	40	25	50	99	25	99	15000	4	4	2	2	1	2				1	4	20	0.1	80	80	80	40	75	75				35	50	5	10000
245	4		2	99	2	4	4	3	99	4	99	200		150		50	20	25	45	99	25	99	15000	4	4	4	2	1	1				99	4	2	0.05	80	80	80	80	75	75				99	50	50	12000
246	1		99	1	1	1	2	1	1	2	99	200		99	25	50	35	35	15	150	20	99	15000	6	10	5	5	1	1				2	4	20	0.1	50	50	50	50	150	150				50	45	5	11000
247	4		4	1	1	2	1	2	8	2	99	400		150	22	60	25	25	40	5	3	99	22000	4	4	2	2	1	2				99	8	35	0.2	80	80	80	80	100	150				99	10	6	20000
248	1		99	4	99	99	3	1	99	99	99	200		99	22	99	99	30	50	99	99	99	20000	10	10	5	10	1	1				99	99	2	0.2	50	50	50	25	75	75				99	99	6	15000
249	2		99	2	99	99	1	99	99	99	99	200		99	25	99	99	20	99	99	99	99	16000	4	1	1	1	1	1				5	8	8	0.1	100	100	100	50	70	75				35	50	5	10000
250	3		99	4	99	2	4	99	99	99	99	480		99	15	99	60	20	99	99	99	99	20000	10	10	5	5	1	1				2	1	10	0.1	40	40	40	25	85	90				45	65	40	12000
251	2		99	2	99	99	1	99	99	2	99	220		99	22	99	99	30	99	99	20	99	16000	4	2	4	3	1	1				3	2	5	0.2	80	40	80	20	150	150				45	65	40	10000
252	1		99	2	99	2	1	99	99	99	99	200		99	20	50	25	99	99	99	99	99	15000	3	5	4	99	1	0.5				99	99	5	0.1	25	40	15	99	150	150				99	99	40	13000
253	3		99	2	4	99	4	6	99	4	99	200		99	25	50	99	25	25	99	16	99	15000	10	4	4	4	99	99				99	4	4	0.25	30	80	20	20	99	99				99	180	25	14000
254	1		99	1	99	99	2	1	99	99	99	100		99	22	99	99	25	25	99	99	99	15000	5	5	4	4	99	99				99	99	2	0.1	100	50	80	80	99	99				99	99	20	8000
255	3.5		99	2	99	99	1	99	99	2	99	200		99	25	99	99	30	99	99	40	99	16000	4	2	2	2	99	99				99	3	8	0.06	100	80	80	80	99	99				99	80	60	12000
256	1		99	4	99	99	2	99	99	99	99	200		99	22	99	99	15	99	99	99	99	10000	4	4	4	3	1	1				1	2	10	0.1	80	80	80	80	85	85				45	65	40	10000
257	3		2	99	99	99	2	99	99	99	99	200		350		99	99	20	99	99	99	99	20000	10	10	5	10	1	1				3	2	10	0.2	40	40	40	40	85	70				45	65	40	15000
258	14		14	1	1	1	3	1	1	1	21	100		750	22	75	15	10	25	100	5	900	15000	5	10	5	2	1	1				3	8	10	0.1	50	50	50	50	100	100				100	75	5	14000
259	14		14	1	1	1	3	1	1	1	21	100		750	22	75	15	10	25	100	5	900	15000	5	10	5	2	1	1				3	8	10	0.1	50	50	50	50	100	100				100	75	5	14000
260	14		14	1	1	1	3	1	1	1	21	100		750	22	75	15	10	25	100	5	900	15000	5	10	5	2	1	1				3	8	10	0.1	50	50	50	50	100	100				100	75	5	14000
261	14		14	1	1	1	3	1	1	1	21	100		750	22	75	15	10	25	100	5	900	15000	5	10	5	2	1	1				3	8	10	0.1	50	50	50	50	100	100				100	75	5	14000
262	14		14	1	1	1	3	1	1	1	21	100		750	22	75	15	10	25	100	5	900	15000	5	10	5	2	1	1				3	8	10	0.1	50	50	50	50	100	100				100	75	5	14000
263	14		14	1	1	1	3	1	1	1	21	100		750	22	75	15	10	25	100	5	900	15000	5	10	5	2	1	1				3	8	10	0.1	50	50	50	50	100	100				100	75	5	14000
264	14		14	1	1	1	3	1	1	1	21	100		750	22	75	15	10	25	100	5	900	15000	5	10	5	2	1	1				3	8	10	0.1	50	50	50	50	100	100				100	75	5	14000
265	14		14	1	1	1	3	1	1	1	21	100		750	22	75	15	10	25	100	5	900	15000	5	10	5	2	1	1				3	8	10	0.1	50	50	50	50	100	100				100	75	5	14000
266	14		14	1	1	1	3	1	1	1	21	100		750	22	75	15	10	25	100	5	900	15000	5	10	5	2	1	1				3	8	10	0.1	50	50	50	50	100	100				100	75	5	14000
267	14		14	1	1	1	3	1	1	1	21	100		750	22	75	15	10	25	100	5	900	15000	5	10	5	2	1	1				3	8	10	0.1	50	50	50	50	100	100				100	75	5	14000
268	14		14	1	1	1	3	1	1	1	21	100		750	22	75	15	10	25	100	5	900	15000	5	10	5	2	1	1				3	8	10	0.1	50	50	50	50	100	100				100	75	5	14000
269	14		14	1	1	1	3	1	1	1	21	100		750	22	75	15	10	25	100	5	900	15000	5	10	5	2	1	1				3	8	10	0.1	50	50	50	50	100	100				100	75	5	14000
270	14		14	1	1	1	3	1	1	1	21	100		750	22	75	15	10	25	100	5	900	15000	5	10	5	2	1	1				3	8	10	0.1	50	50	50	50	100	100				100	75	5	14000
271	14		14	1	1	1	3	1	1	1	21	100		750	22	75	15	10	25	100	5	900	15000	5	10	5	2	1	1				3	8	10	0.1	50	50	50	50	100	100				100	75	5	14000
272	14		14	1	1	1	3	1	1	1	21	100		750	22	75	15	10	25	100	5	900	15000	5	10	5	2	1	1				3	8	10	0.1	50	50	50	50	100	100				100	75	5	14000
273	14		14	1	1	1	3	1	1	1	21	100		750	22	75	15	10	25	100	5	900	15000	5	10	5	2	1	1				3	8	10	0.1	50	50	50	50	100	100				100	75	5	14000
274	14		14	1	1	1	3	1	1	1	21	100		750	22	75	15	10	25	100	5	900	15000	5	10	5	2	1	1				3	8	10	0.1	50	50	50	50	100	100				100	75	5	14000
275	14		14	1	1	1	3	1	1	1	21	100		750	22	75	15	10	25	100	5	900	15000	5	10	5	2	1	1				3	8	10	0.1	50	50	50	50	100	100				100	75	5	14000
276	14		14	1	1	1	3	1	1	1	21	100		750	22	75	15	10	25	100	5	900	15000	5	10	5	2	1	1				3	8	10	0.1	50	50	50	50	100	100				100	75	5	14000
277	14		14	1	1	1	3	1	1	1	21	100		750	22	75	15	10	25	100	5	900	15000	5	10	5	2	1	1				3	8	10	0.1	50	50	50	50	100	100				100	75	5	14000
278	5		5	1	1	1	1	1	1	1	1	100		1200	25	65	25	15	30	60	30	1000	12000	4	10	10	8	3	3				99	3	4	0.2	150	50	50	50	80	80				99	25	15	7000
279	3		99	1	1	1	1	1	1	1	2	100		99	25	120	50	25	50	200	15	900	24000	10	4	6	6	99	99				99	99	8	0.1	30	30	30	30	99	99				99	99	10	22000
280	3		99	1	1	1	1	1	1	1	2	100		99	25	120	50	25	50	200	15	900	24000	10	4	6	6	99	99				99	99	8	0.1	30	30	30	30	99	99				99	99	10	22000
281	3		3	3	99	3	1	1	99	99	3	100		350	24	99	25	15	40	99	99	1000	20000	10	99	4	99	99	99				99	99	20	0.2	100	99	50	99	99	99				99	99	4	19000
282	1		99	2	99	99	99	99	99	99	99	100		99	25	99	99	99	99	99	99	99	15000	4	4	4	4	99	99				99	99	4	0.1	100	100	100	20	99	99				99	99	5	15000
283	1		99	3	1	2	99	2	99	99	1	90		200	25	60	30	99	20	99	99	1000	14400	5	5	5	5	99	99				99	99	2	0.2	100	100	20	20	99	99				99	99	15	9000
284	1		1	4	1	1	99	1	99	99	1	100		200	25	50	30	99	40	99	99	950	15000	10	10	1	5	99	99				2	99	1.5	0.1	50	50	50	50	99	99				25	99	5	15000
285	5		99	4	99	1	4	1	99	99	99	100		99	25	99	25	15	40	99	99	99	10000	10	10	2	5	99	99				99	99	4	0.1	50	50	50	50	99	99				99	99	5	7000
286	5		99	2	2	99	2	99	99	99	99	100		99	25	99	30	99	35	99	99	99	24000	8	8	6	6	99	99				99	99	4	0.2	50	50	50	30	99	99				99	99	8	20000
287	10		2	2	2	2	2	3	99	1	1	100		150	24	25	20	20	14	99	20	1000	24000	8	8	5	5	3	3				99	5	4	0.1	100	100	40	100	80	80				99	20	5	12000
288	7		7	1	7	8	3	2	5	1	99	100		100	25	50	60	5	60	220	15	99	20000	5	5	5	2	2	2				2	4	2	0.2	60	60	60	60	75	75				80	22	50	19000
289	2		2	3	1	1	1	99	99	99	99	100		100	25	50	60	5	99	99	99	99	20000	5	5	5	2	2	2				2	4	2	0.2	60	60	60	60	75	75				80	22	50	19000
290	3		3	2	2	2	2	2	2	2	99	100		50	25	70	12	10	120	200	10	99	20000	5	5	5	2	0.5	5				99	1	1	0.2	25	25	25	25	75	75				99	160	50	18000
291	2.5		2.5	1	2	1	1	1	1	1	2.5	100		300	25	35	25	15	26	60	10	850	11000	10	10	6	2	99	99				99	99	3	0.2	30	30	30	30	99	99				99	99	6	8000
292	5		5	5	2	2	5	2	2	2	99	100		450	22	75	25	10	24	150	10	99	10000	10	10	5	5	99	99				99	99	3	0.2	40	40	40	20	99	99				99	99	6	8000
293	3		3	10	3	3	3	4	2	5	1	100		1200	25	65	25	15	30	60	10	1000	12000	3	10	5	5	3	3				99	3	4	0.2	200	50	50	50	80	80				99	25	15	8000
294	1		1	2	2	5	99	1	2	3	99	100		1000	30	17	5	99	25	62.5	18	99	12000	6	6	6	4	99	99			4	99	99	4	0.2	30	30	30	30	99	99			12	99	99	5	8000
295	1		1	2	99	2	1	1	1	1	99	100		1000	25	99	25	5	30	5	25	99	20000	5	5	5	5	99	99				99	99	8	0.2	30	30	30	30	99	99				99	99	5	15000
296	2		2	2	3	2	2	2	2	1	99	400		340	30	150	30	20	25	200	15	99	12000	10	10	10	5	99	2	3	2		99	99	6	0.2	30	30	30	30	99	20	18	150		99	99	8	10000
297	1		1	2	1	2	1	99	1	2	99	200		400	24	20	35	30	99	200	20	99	12000	4	4	4	4	2	10			2	2	2	2	0.2	25	25	25	25	28	40			28	28	28	30	8000
298	5		5	1	1	1	1	1	1	1	1	100		1200	25	65	25	15	30	60	30	1000	12000	4	10	10	8	3	3				99	3	4	0.2	150	50	50	50	80	80				99	25	15	7000
299	5		5	1	1	1	1	1	1	1	1	100		1200	25	65	25	15	30	60	30	1000	12000	4	10	10	8	3	3				99	3	4	0.2	150	50	50	50	80	80				99	25	15	7000
300	5		5	1	1	1	1	1	1	1	1	100		1200	25	65	25	15	30	60	30	1000	12000	4	10	10	8	3	3				99	3	4	0.2	150	50	50	50	80	80				99	25	15	7000
301	5		5	1	1	1	1	1	1	1	1	100		1200	25	65	25	15	30	60	30	1000	12000	4	10	10	8	3	3				99	3	4	0.2	150	50	50	50	80	80				99	25	15	7000
302	0.75		99	1	99	99	1	1	1	99	99	100		99	22	99	99	15	45	85	99	99	15000	4	4	4	2	1	1				2	4	20	0.1	80	80	80	80	70	75				50	80	5	12000
303	1.5		99	2	2	4	6	1	99	99	99	200		99	22	70	25	15	45	99	99	99	10000	4	4	4	2	1	1				99	99	2	0.05	80	80	80	40	70	75				99	99	100	8000
304	20		20	6	2	6	6	3	4	99	99	200		300	25	100	25	25	50	200	99	99	23000	4	4	2	2	1	1				2	2	1	0.1	80	80	100	100	75	5				70	30	100	22000
305	2		99	5	3	2	2	99	99	99	99	200		99	25	50	35	35	99	99	99	99	20000	4	4	4	4	99	99				99	99	5	0.1	80	80	80	80	99	99				99	99	7	15000
306	6		6	1	2	1	1	3	3	1	6	200		200	22	75	25	20	45	150	25	800	16000	5	10	5	10	1	1				3	1.5	10	0.05	40	40	40	40	85	90				45	65	5	13000
307	0.5		99	2	1	1	1	99	99	99	0.5	100		99	40	99	40	20	25	99	99	1000	12000	1	1	1	1	99	99				99	8	10	0.1	100	100	50	100	99	99				99	40	4	8000
308	1		99	1	99	99	1	99	1	1	99	200		99	20	99	99	20	99	200	20	99	10000	10	10	5	5	99	99				99	10	2	0.1	25	25	25	25	99	99				99	30	6	8000
309	1		1	1	1	99	1	1	1	1	99	200		400	22	75	99	35	40	120	25	99	12000	5	6	5	5	99	99				99	4	1.5	0.15	40	50	25	25	99	99				99	30	30	8000
310	4		99	1	1	1	1	1	1	1	4	200		99	22	70	15	35	60	150	15	800	27000	5	10	5	10	1	2				99	8	20	0.2	40	40	40	40	133	133				99	50	6	22000
311	1		99	1	1	1	3	99	1	99	0.5	200		99	22	70	15	35	99	150	99	800	26000	10	10	5	10	1	2				99	8	18	0.2	40	40	40	40	133	133				99	50	6	21000
312	3		3	5	2	1	3	2	2	5	3	200		250	22	70	25	60	45	200	25	900	22000	5	12	5	3	1	2				4	6	4	0.1	40	30	40	40	70	75				35	80	6	20000
313	1		99	1	1	99	99	1	99	1	99	100		99	24	70	99	99	60	99	20	99	22000	4	4	2	2	1	1				99	6	6	0.1	80	80	80	80	70	75				99	80	12	16000
314	1.5		99	5	99	99	4	1	10	99	99	200		99	15	99	99	22	60	3	99	99	16000	4	4	2	2	0.5	0.5				99	6	6	0.1	80	80	80	80	70	75				99	80	12	10000
315	1.5		99	3	2	99	3	2	1	2	99	200		99	25	50	99	35	15	25	20	99	16000	5	4	2	4	0.25	99				99	2	4	0.05	40	80	80	80	70	99				99	80	6	14000
316	3		99	2	1	1	1	1	1	1	1	200		99	24	70	35	35	25	250	20	700	16000	5	4	2	4	99	99				99	3	1	0.05	50	100	100	100	99	99				99	70	100	14000
317	2		99	4	4	1	1	99	10	99	99	200		99	25	25	30	25	99	4	99	99	18000	5	5	5	5	1	2				99	6	48	0.1	100	100	100	25	75	75				99	25	5	15000
318	3		3	2	2	99	4	1	1	99	4	200		400	25	30	99	15	30	10	99	800	20000	8	16	6	6	99	99				1	2	6	0.1	100	50	50	30	99	99				20	15	10	16000
319	1.5		99	22	99	99	3	99	99	99	1.5	200		99	22	99	99	20	99	99	99	800	20000	10	10	4	4	99	99				99	99	30	0.1	50	50	50	50	99	99				99	99	4	19000
320	2		2	1	1	1	2	1	1	1	1.5	50		100	30	70	30	20	20	150	20	1000	20000	10	5	1	1	0.5	1				99	2	2	0.2	30	30	150	80	180	150				99	145	25	15000
321	2		99	4	99	2	4	2	2	99	99	50		99	25	30	15	25	50	99	99	99	10000	2	2	2	2	99	99				99	99	99	0.1	30	30	30	30	99	99				99	99		7000
322	1.5		99	2	1	2	2	1	1	99	99	50		99	30	60	30	20	30	120	99	99	24000	3	3	3	3	99	99				99	99	1	0.1	30	30	30	30	99	99				99	99	60	20000
323	1		3	99	99	1	2	99	99	99	99	100		99	30	99	99	35	50	99	99	99	6000	8	8	4	4	99	99				99	99	6	0.2	25	25	25	25	99	99				99	99	6	1000
324	1		99	2	1	2	1	1	1	99	99	100		99	30	50	50	20	35	50	99	99	24000	3	3	3	3	99	99				99	99	7	0.1	25	25	25	25	99	99				99	99	6	18000
325	5		99	2	1	2	2	1	99	2	99	50		99	30	60	30	20	25	99	20	99	24000	3	3	3	3	99	99				99	99	10	0.1	30	30	30	30	99	99				99	99	4	18000
326	2		99	1	1	1	1	99	1	1	99	50		99	25	60	35	40	99	200	40	99	23000	8	8	2	2	99	99				99	99	7	0.1	30	30	25	25	99	99				99	99	6	20000
327	3		99	3	99	4	3	4	1	3	99	150		99	25	99	25	20	30	150	20	99	18000	4	4	4	4	99	99				99	99	4	0.1	80	80	60	30	99	99				99	99	10	10000
[truncated: 28 more columns]
